# Supplementary material
Source: PubMed Central journal article supplement (PMC2597394)
Supplement: NIHMS62375-supplement-Supp_Data.pdf [file NIHMS62375-supplement-Supp_Data.pdf]

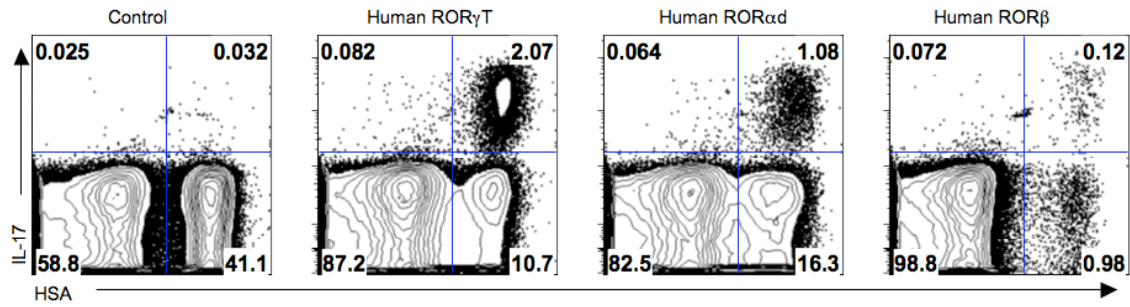

**Supplementary Figure 1: IL-17 expression following ROR $\gamma$ T, ROR $\alpha$ d and ROR $\beta$  transduction.** Flow cytometry of naive cord blood CD4<sup>+</sup> T cells transduced with ROR $\gamma$ T, ROR $\alpha$ d and ROR $\beta$  in RPMI-10% FBS alone. Intracellular IL-17 was analyzed at day 6. Numbers indicate the percentage of cells in each quadrant. Data are representative of three independent experiments.

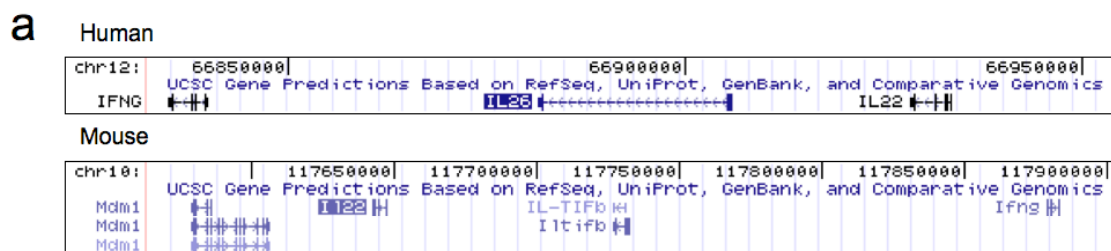

**b**

| Species        | Evidence for IL26 gene | Identity to human IL26 protein |
|----------------|------------------------|--------------------------------|
| Chimpanzee     | XM_001152032           | 100%                           |
| Rhesus macaque | XM_001117154           | 95%                            |
| Cow            | XM_001250651           | 86%                            |
| Pig            | DQ995650               | 86%                            |
| Dog            | XM_846075              | 81%                            |
| Rat            | Not found              | NA                             |
| Mouse          | Not found              | NA                             |
| Opossum        | XM_001373815           | 57%                            |
| Platypus       | XM_001511139           | 52%                            |
| Human IL22     |                        | 20%                            |

**Supplementary Figure 2: *IL26* gene has been lost in mice and rats.** (a) Genomic organization of the *IL22* locus based on UCSC genome browser. In humans, *IL22* is followed by *IL26* and *IFNG* in the same locus. In the mouse, *IL22* is followed by *Il22* (a duplication of *IL22*) and *Ifng*, while *IL26* is absent. (b) Among species, *IL26* can be detected in pre-placental vertebrates, but cannot be found in the mouse or rat genome. GenBank accession numbers and amino acid identity to human IL-26 are indicated. Human IL-22 is shown for comparison.

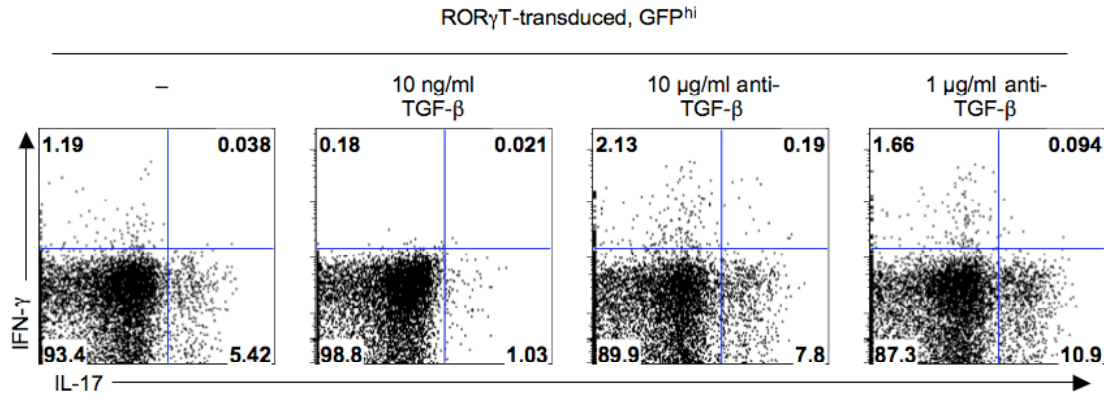

**Supplementary Figure 3: TGF- $\beta$ , anti-TGF- $\beta$  effect on IL-17 expression following ROR $\gamma$ T transduction.** Flow cytometry of naive cord blood CD4<sup>+</sup> T cells in serum-containing medium transduced with a lentivector expressing ROR $\gamma$ T and GFP and no added cytokine (left) or with added recombinant TGF- $\beta$  (second from left) or two concentrations of anti-TGF- $\beta$  (two right panels). IL-17 and IFN- $\gamma$  expression was analyzed at day 6 in GFP<sup>hi</sup> cells. Data are representative of three independent experiments.

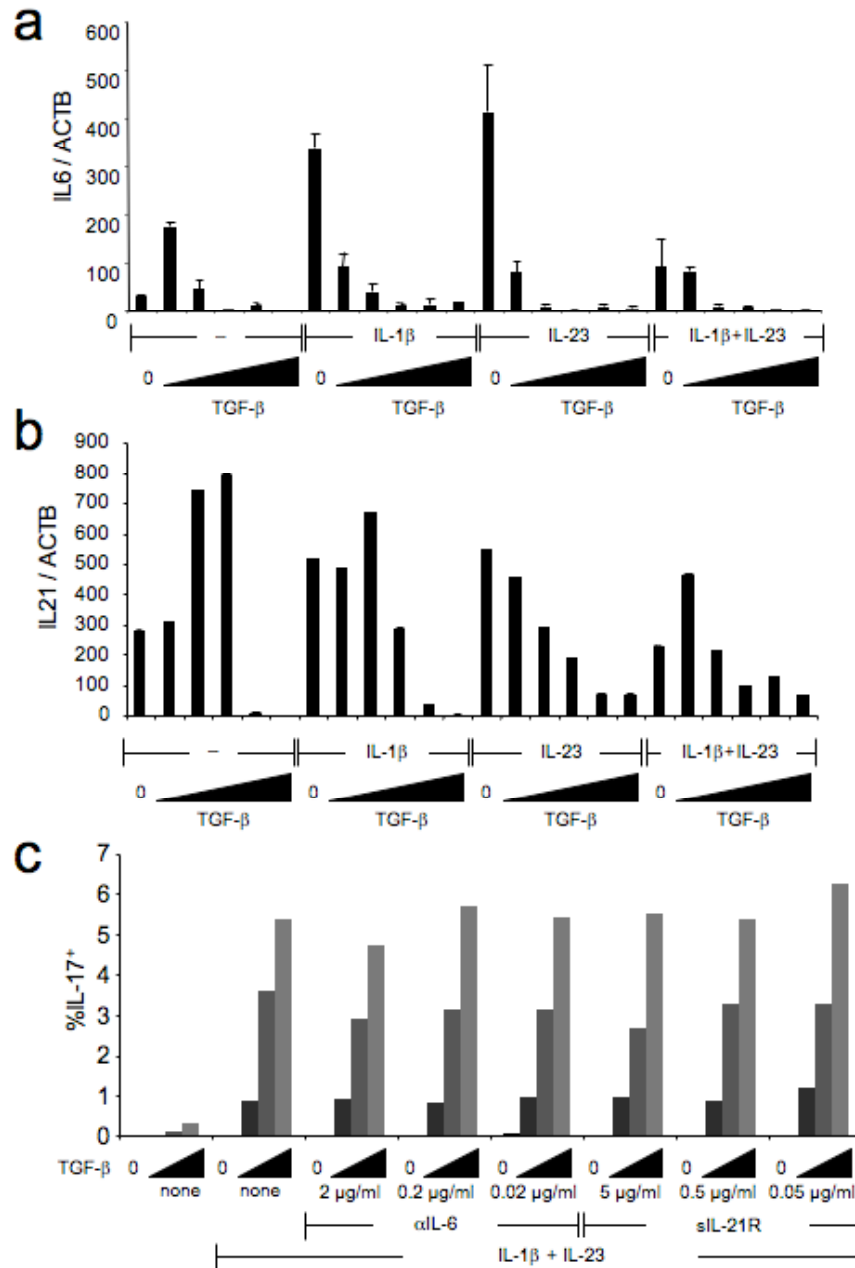

**Supplementary Figure 4: Expression and neutralization of IL-6 and IL-21.** (a,b) Quantitative RT-PCR of *ACTB* (a) and *IL21* (b) mRNA in naive cord blood CD4<sup>+</sup> T cells were cultivated with IL-2 alone or with IL-1 $\beta$  + IL-2, IL-23 + IL-2 or IL-23 + IL-1 $\beta$  + IL-2 and increasing concentrations of TGF- $\beta$ ; mRNAs were analyzed on day 6 following restimulation with PMA and ionomycin. (c) Graph of the percent of IL-17<sup>+</sup> in naive cord blood CD4<sup>+</sup> T cells cultivated with IL-2 alone or with IL-23 + IL-1 $\beta$  + IL-2 and increasing concentrations of TGF- $\beta$ , as determined by flow cytometry. Increasing concentrations of neutralizing anti-IL-6 and soluble IL-21 receptor were also added. IL-17 expression was analyzed at day 6. Data are representative of two independent experiments.

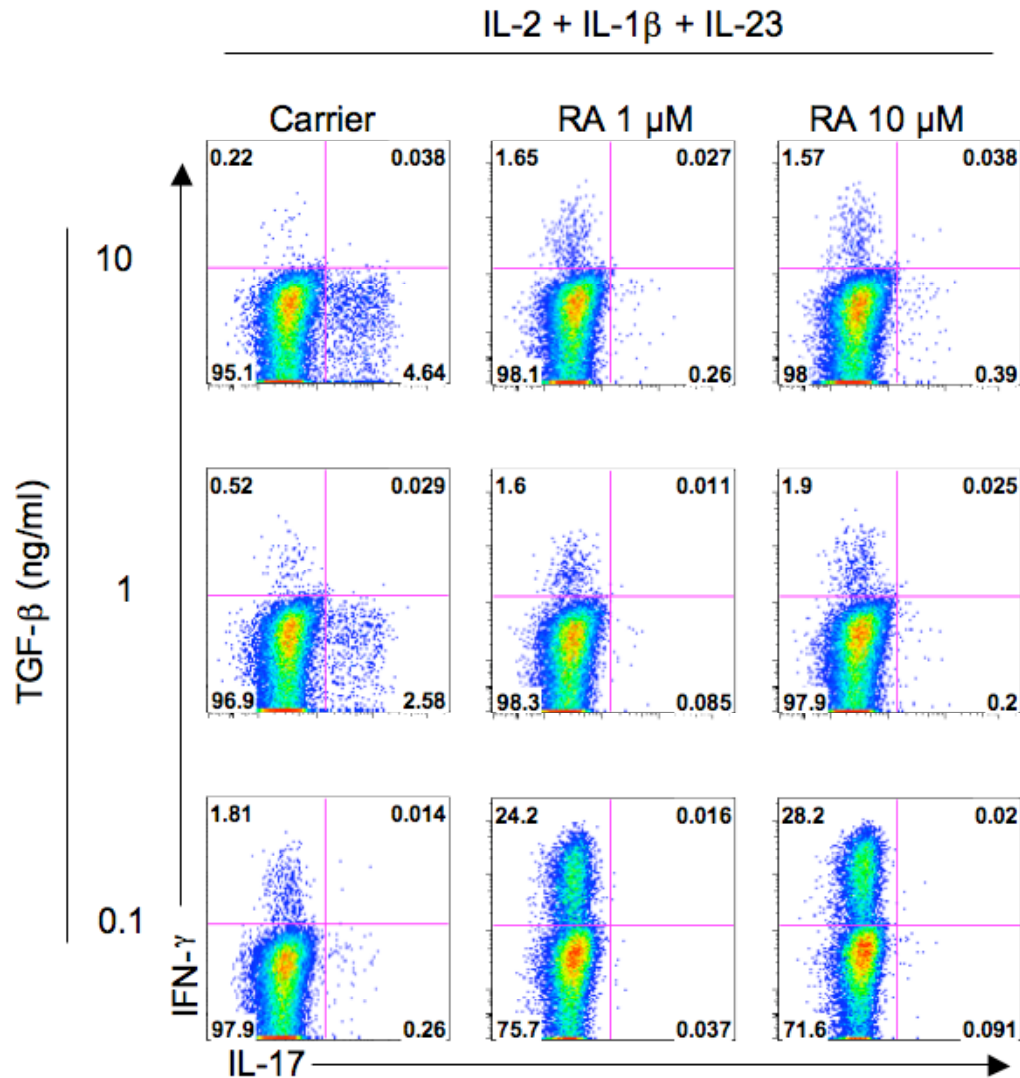

**Supplementary Figure 5: Retinoic acid inhibits IL-17 induction.** Flow cytometry of naive cord blood CD4<sup>+</sup> T cells activated with a combination of IL-2 + IL-1 $\beta$  + IL-23 + TGF- $\beta$  (0.1, 1 and 10 ng/ml), without (left) or with retinoic acid (1  $\mu$ M (middle) and 10  $\mu$ M (right)). IL-17 and IFN- $\gamma$  expression was analyzed at day 6. Data are representative of three independent experiments.

**a**

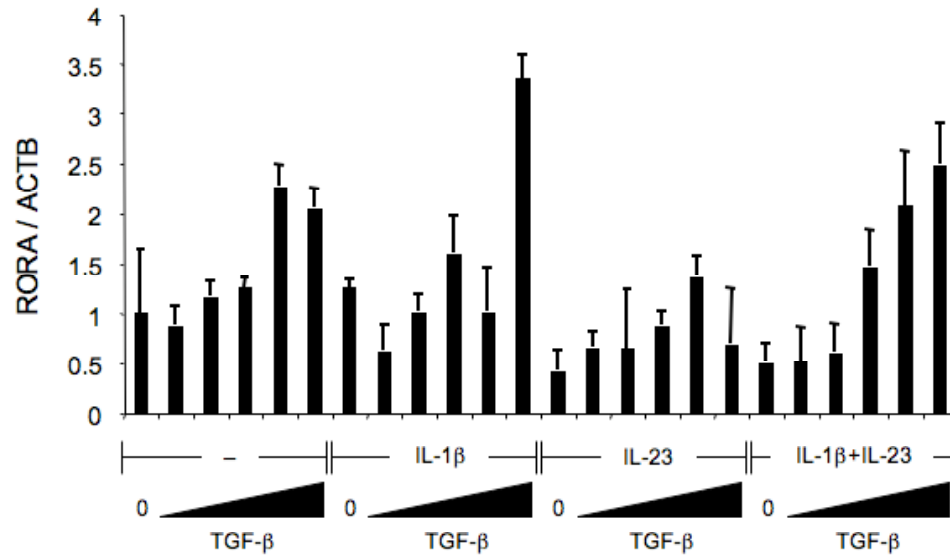

**b**

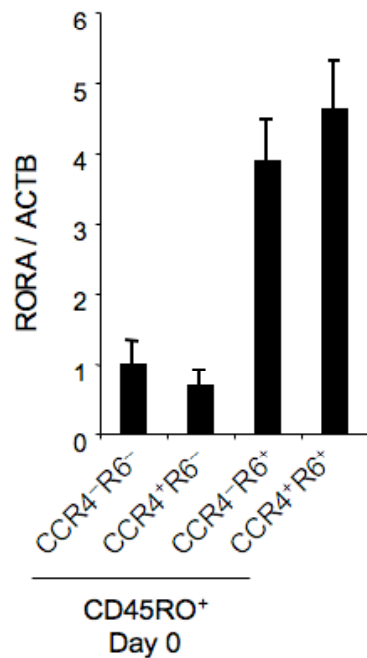

**Supplementary Figure 6: Expression of RORA.** (a) Quantitative RT-PCR of *ACTB* and *RORA* mRNA in naive cord blood CD4<sup>+</sup> T cells cultivated in IL-2 alone or, IL-1β + IL-2, IL-23 + IL-2 or IL-23 + IL-1β + IL-2 and increasing concentrations of TGF-β; mRNAs were analyzed on day 6. (b) Quantitative RT-PCR of *RORA* and *ACTB* expression measured in freshly sorted CCR4<sup>-/-</sup>CCR6<sup>-/-</sup> adult memory CD4<sup>+</sup> T cells. Data are representative of four independent experiments.

**Supplementary Table 1: Antibodies used in this study.**

| Antigen               | Clone or Catalog number | Company     |
|-----------------------|-------------------------|-------------|
| CCR6-FITC             | FAB196F                 | R&D         |
| CCR6-biotin           | 11A9                    | BD          |
| CD3-Alexa750Cy7       | UCHT1                   | eBioscience |
| CD4-PacBlue           | OKT4                    | eBioscience |
| CD25-APC              | 555434                  | BD          |
| CD45RA-PE             | HI100                   | eBioscience |
| CD45RO-APC            | UCHL1                   | eBioscience |
| IL-17-APC             | eBio64CAP17             | eBioscience |
| IL-17-FITC            | eBio64DEC17             | eBioscience |
| IL-22-PE              | IC7621P                 | R&D         |
| IFN $\gamma$ -PECy7   | 45.B3                   | eBioscience |
| HLA-DR-FITC           | 555558                  | BD          |
| HSA-PE (mCD24)        | 553262                  | eBioscience |
| CD3 purified          | UCHT1                   | eBioscience |
| CD28 purified         | CD28.2                  | eBioscience |
| TGF- $\beta$ purified | 1D11                    | R&D         |
| IL-2 purified         | 5334.21                 | R&D         |
| IL-4 purified         | MP425D2                 | eBioscience |
| IL-6 purified         | MQ2-13A5                | eBioscience |
| IFN $\gamma$ purified | NIB42                   | eBioscience |

**Supplementary Table 2: Oligonucleotides used in this study.**

| Gene         | Orientation | Sequence                      |
|--------------|-------------|-------------------------------|
| <i>ACTB</i>  | F           | GGACTTCGAGCAAGAGATGG          |
| <i>ACTB</i>  | R           | AGCACTGTGTTGGCGTACAG          |
| <i>ACTB</i>  | Probe       | CTCTTCCAGCCTTCCTTCCT          |
| <i>RORA</i>  | F           | CGGTGCCTTTGACTCTCAGAACAACACCG |
| <i>RORA</i>  | R           | TCTTTCCAAATTCAAACACAAAGC      |
| <i>RORA</i>  | Probe       | TTGATGGGAAGTATGCCAGC          |
| <i>RORC</i>  | F           | TTTTCCGAGGATGAGATTGC          |
| <i>RORC</i>  | R           | CTTTCCACATGCTGGCTACA          |
| <i>RORC</i>  | Probe       | AAGACTCATCGCCAAAGCAT          |
| <i>IL23R</i> | F           | CATGACTTGCACCTGGAATG          |
| <i>IL23R</i> | R           | GCTTGGACCCAAACCAAGTA          |
| <i>IL23R</i> | Probe       | TGATTCATTACAAGGTGGCAA         |
| <i>IL17F</i> | F           | TGAAGCTTGACATTGGCATC          |
| <i>IL17F</i> | R           | TTCCTTGAGCATTGATGCAG          |
| <i>IL17F</i> | Probe       | ACCTCCCCCTGGAATTACAC          |
| <i>IL17</i>  | F           | ACCAATCCCAAAAGGTCCTC          |
| <i>IL17</i>  | R           | GGGGACAGAGTTCATGTGGT          |
| <i>IL17</i>  | Probe       | GCAATGAGGACCCTGAGAGA          |
| <i>IL26</i>  | F           | TGCAAGGCTGCAAGAAAATA          |
| <i>IL26</i>  | R           | CCAGTTCACTGATGGCTTTG          |
| <i>IL26</i>  | Probe       | GGCAGAAATTGAGCCACTGT          |
| <i>IL6</i>   | F           | AAAGAGGCACTGGCAGAAAA          |
| <i>IL6</i>   | R           | TTTCACCAGGCAAGTCTCCT          |
| <i>IL21</i>  | F           | TTCTGCCAGCTCCAGAAGAT          |
| <i>IL21</i>  | R           | TTGTGGAAGGTGGTTTCCTC          |
| <i>IL21</i>  | Probe       | TGGTCAGCTTTTTCCTGCTT          |
